# Supplementary material for: Interferences caused by the microbial methane cycle during the assessment of abandoned oil and gas wells
Source: Copernicus journal article supplement (doi:10.5194/egusphere-2024-1461), 2024-06-19
Supplement: Supplementary file 1 [file egusphere-2024-1461-supplement.zip]

## Supplement of

# Interferences caused by the microbial methane cycle during the assessment of abandoned oil and gas wells

Sebastian F. A. Jordan<sup>1\*</sup>, Stefan Schloemer<sup>1</sup>, Martin Krüger<sup>1</sup>, Tanja Heffner<sup>2</sup>, Marcus A. Horn<sup>2</sup>, Martin Blumenberg<sup>1\*</sup>

<sup>1</sup>Federal Institute for Geosciences and Natural Resources (BGR), Hannover, Stilleweg 2, 30655, Germany

<sup>2</sup>Leibniz Universität Hannover, Institute for Microbiology, Herrenhäuser Str. 2, Hannover, 30419, Germany

Correspondence to: Sebastian F. A. Jordan ([Sebastian.Jordan@bgr.de](mailto:Sebastian.Jordan@bgr.de)), Martin Blumenberg ([Martin.Blumenberg@bgr.de](mailto:Martin.Blumenberg@bgr.de))

## S1 Lipids after aerobic methane oxidation in the laboratory

It is well known that many methanotrophic bacteria of the Type I ( $\gamma$ -Proteobacteria) and Type II ( $\alpha$ -Proteobacteria) cluster consist of specific phospholipid fatty acids (PLFA) with Type I mainly consisting of 14 and 16 carbon atoms and Type II of 18 carbon atom PLFA (e.g., Bodelier et al. (2009) and references therein). Furthermore, many of the methanotrophic bacteria in these Type clusters contain signature PLFA with C16:1 $\Delta$ 8c and C16:1 $\Delta$ 11t (or C16:1 $\omega$ 8c and C16:1 $\omega$ 5t, respectively) specific for Type I and C18:1 $\Delta$ 10c or C18:1 $\omega$ 8c for type II (Bowman et al., 1991; Nichols et al., 1985). This classification was, however, challenged by findings of the Type I specific 16:1 $\omega$ 8 (together with an abundant 18:1 $\omega$ 8) in the Type II methanotroph *Methylocystis heyeri* (Dedysh et al., 2007). *Methylocystis* are demonstrated to be abundant at Northern Europe, acidic peatlands (Dedysh, 2009) like e.g. Steimbke. In concordance to these studies, *Methylocystis* were indeed prominent in our phylogenetic data of the peat organic matter used for this study from Steimbke (sample 7468) prior and after the lab experiment. Furthermore, all Type II methanotrophic *Beijerinckia* species lack the classical 18:1 $\omega$ 8 PLFA (Knief, 2015 and reference therein). The differentiation between Type I and II methanotrophs is therefore complicated, while the presence of  $\omega$ 8 unsaturated PLFA in general remain a strong hint to methanotrophic bacteria.

## Material & Methods

Peat soil samples taken in 2022 at Steimbke, two samples from the Meadow and Peat sites both with underlying peat, and two other sites for comparison were incubated with about 1–2% methane in air for a duration of 22 hours up to 58 days (see Table S1). Four experiments were analyzed for changes in the lipid composition in the course of the experiments. The following samples were processed:

30

**Table S1:** Experiments analyzed for lipid changes during the course of methane addition (prior and after the experiments). Samples  
originate from the Peat site near Steimbke and the Nienhagen oil field

| ID   | origin                                                    | time [h] | MOx activity | MOx rate [ $\mu\text{mol g}^{-1} \text{d}^{-1}$ ] |
|------|-----------------------------------------------------------|----------|--------------|---------------------------------------------------|
| 7468 | Rodewald WA-272 (Steimbke peat extraction site), 10–15 cm | 3        | high         | 200                                               |
| 7470 | Rodewald WA-275 (Steimbke meadow/peats) , 10–15 cm        | 22.5     | low          | 5                                                 |
| 7732 | Carolinenhall, Nienhagen oil field, 10–15 cm              | ~1400    | None         | 0                                                 |
| 7734 | Carolinenhall, Nienhagen oil field, 10–15 cm              | ~1400    | none         | 0                                                 |

34

All samples were subjected to alkaline hydrolysis to cleave intact phospho- and glycolipids using a method slightly modified after e.g., Oppermann et al. (2010). Briefly, 5 g soil samples were subjected to 6% KOH in methanol (MeOH) in excess for 2 h at 80°C in a screwed glass centrifuge tube. The resulting neutral lipids (NL) were extracted with *n*-hexane and were further separated into fractions of increasing polarity (hydrocarbons, ketones/aldehydes, alcohols, polar rest). Prior of the analysis, the alcohols were silylated with N,O-bis(trimethylsilyl)trifluoroacetamide (BSTFA). Acids extracted from the acidified residue after KOH-methanol hydrolysis, were transferred into their fatty acid methyl esters (FAME) in a screwed vial using trimethylchlorosilane (TMCS in MeOH 1:9; v:v; 2 h; 80 °C) and the combined extracted *n*-hexane phases (3x) were then, in addition to hydrocarbon, ketone/aldehyde and alcohol (BSTFA treated) fractions, analyzed with a GC-MS. The GC-MS comprised of an Agilent-7890 gas chromatograph equipped with a Programmable Temperature Vaporizing inlet splitting on two 50 m DB-1 columns (Agilent; 0.2 mm inner diameter; 0.11  $\mu\text{m}$  film thickness), coupled to an FID and to an Agilent 7000 QQQ MS, each. Helium was used as carrier gas. MS-measurements were carried out in full scan mode. Compounds were identified by mass spectra and retention times in comparison with measurements of standard compounds. Here, only the acid fractions are presented and for simplification are named phospholipid fatty acids or “PLFA”, which make up the main compounds in fresh soil samples after alkaline hydrolysis. Position of double bonds were determined after GC-MS analyses of DMDS derivatives of FAME using a method modified after Buser et al. (1983) and Gatellier et al. (1993). Details can be found elsewhere (Berndmeyer et al., 2013).

**Results and Discussion**

Fatty acids including hydrolyzed acids from phospho- and glycolipids remained relatively similar in all experiments (Figure S1). For better comparison the relative changes were visualized from normalizing the (short chain) fatty acid composition to the eicosanoic acid methyl ester, which was assumed to remain unchanged as this likely originates from plant litter (and not microbial lipids). However, some peaks (three specific unsaturated C16 and C18 fatty acids marked with an arrow in (Figure S1) increased in the course of one experiment, where methane oxidation rate was high (7468). These compounds were mostly

absent in other experiments and did also not change in those experiments after methane-addition. Further analyses of the double bond positions revealed C16:1 $\omega$ 8c and C18:1 $\omega$ 8 (and, less specific, 16:1 $\omega$ 7), which are specific to methanotrophic bacteria. Normalized to 100% of FAMES shown in Fig. S1 (without C20:0) C16:1 $\omega$ 8 increased in the experiment 7468 (peat site) from 0.69 to 3.37% and C18:1 $\omega$ 8 from 0.95 to 4.67%. Also C16:1 $\omega$ 7 increased slightly in abundance from 0.57 to 1.26%. This compound is abundant in the other experiment samples as well, but remained unchanged there. Thus, it appears less specific. C16:1 $\omega$ 8 and C18:1 $\omega$ 8 are the most abundant PLFA in *Methylocystis heyeri* (Dedysh et al., 2007) and a *Methylocystis*-origin is in line with our phylogenetic data.

Although changes are specific to methanotrophic bacteria, changes in the PLFA (and free fatty acids) are relatively minor. This, however, is not uncommon and even occurs in highly active samples and can be explained by the high (non-methanotrophic) load of microbial and plant organic matter in the original soil (peat) samples Knoblauch et al. (2008) and the likely generally relatively low abundance of methanotrophs among the microbial community in peat (Kaupper et al., 2021). PLFA data are indicative of the presence of methanotrophic stemming PLFA in the original sample 7468, while respective biomarkers are lacking at the other sites. This evidences the presence of methanotrophic bacteria in the studied peats and the presence of PLFA known from *Methylocystis*-relatives is in line with phylogenetic proofs of this group of MOB. In sample 7470, only very low methane oxidation was observed during the lab experiments compared to rates in samples 7468. In addition, the methane concentrations in the original surrounding soil gases were much lower in 7470 than in 7468 (on average 9 ppm CH<sub>4</sub> and 24% CH<sub>4</sub>, respectively). PLFA data were lacking proof of MOB in 7470 from Steimbke (prior and after the experiment) as well as in other studied samples from another area in Lower Saxony (7732 and 7734).

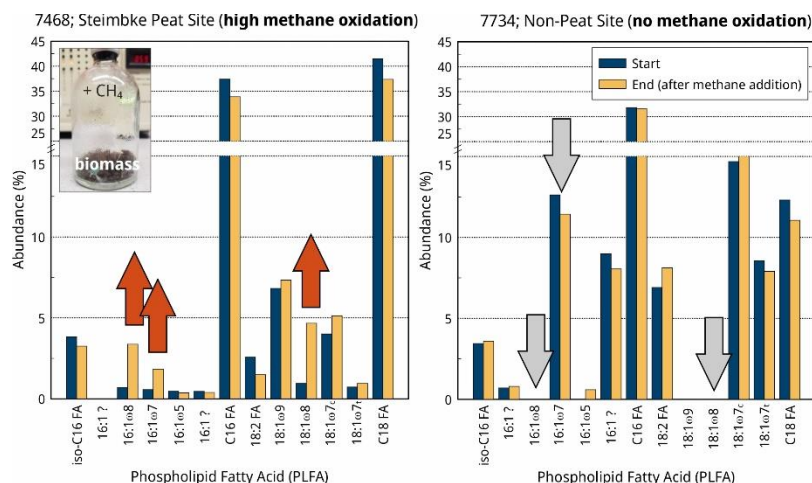

**Figure S1:** Relative changes of fatty acids of selected samples after KOH-hydrolysis, indicating changes in the microbial community (and/or heterogeneities in the samples). The samples originating from the peat site near Steimbke (7468) with high methane oxidation and the Nienhagen oil field (7734) where no methane oxidation activity was observed in the laboratory for comparison.

S2 Fractionation factor of aerobic methane oxidation in the laboratory

84 **Materials & Methods**

86 A peat soil sample (7644) taken in 2023 at Steimbke (depth: 10–25 cm) was incubated with about 3% methane in air. This  
88 sample was taken at the industrial peat site, where methane in the soil gas was highly concentrated. The sample, however, does  
not resemble that taken for the incubation experiments for PLFA analyses (7468). Three incubations were run in parallel and  
stopped after 24 h, 48 h, and 72 h (Table S2). Gases in the headspace of the vials were sampled and analyzed for gas  
composition and stable carbon isotopic signatures (for CH<sub>4</sub> and CO<sub>2</sub>). Gas samples were analyzed with a refinery gas analyzer  
and carbon isotopes with a GC-IRMS. More details can be found in the main paper (sections 2.4).

92 **Table S2:** Experimental isotope ( $\delta^{13}\text{C}$ ) and concentration data of gases in the headspace after addition of methane (sample 7644; Steimbke  
peat).  $f$  = fraction of remaining methane after addition.

| ID                       | time [h] | N <sub>2</sub> [%] | CH <sub>4</sub><br>[ppm] | CO <sub>2</sub> [ppm] | O <sub>2</sub> [ppm] | CH <sub>4</sub> [ $\delta^{13}\text{C}$ ] | CO <sub>2</sub> [ $\delta^{13}\text{C}$ ] | $f$  | $\epsilon$ [‰] |
|--------------------------|----------|--------------------|--------------------------|-----------------------|----------------------|-------------------------------------------|-------------------------------------------|------|----------------|
| 7644                     | 0        | 75.7               | 32,729                   | 414                   | 195,500              | −44.58                                    | −28.44                                    | 1.00 |                |
| 7644                     | 24       | 77.7               | 23,717                   | 7811                  | 170,001              | −31.08                                    | −68.84                                    | 0.72 |                |
| 7644                     | 48       | 79.9               | 10,974                   | 14,513                | 156,917              | −8.01                                     | −59.18                                    | 0.34 |                |
| 7644                     | 72       | 81.1               | 2967                     | 19,006                | 147,561              | 31.41                                     | −51.05                                    | 0.09 |                |
| <b>Enrichment factor</b> |          |                    |                          |                       |                      |                                           |                                           |      | <b>−31.3</b>   |

94

**Results & Discussion**

96 Gas composition changed during the experiment with methane strongly and oxygen slightly de- and CO<sub>2</sub> increasing, typical  
for an experiment where methane is aerobically oxidized. At the same time,  $\delta^{13}\text{C}$  values of CH<sub>4</sub> increased strongly, whereas  
98  $\delta^{13}\text{C}$  values of CO<sub>2</sub> decreased.

Figure S2 depicts the isotopic composition of the remaining methane, instantaneous and accumulating carbon dioxide as  
100 function of the fraction of the remaining methane (solid lines) assuming an initial zero CO<sub>2</sub> concentration. According to the  
mass and isotope balances at the time of the first experimentally measured  $\delta^{13}\text{C}$ -CO<sub>2</sub> value (at  $f = 0.72$ ) the large amount of  
102 accumulating CO<sub>2</sub> (28% of ~3% added methane oxidized) with a cumulative  $\delta^{13}\text{C}$ -value of −71‰ easily shifts the original  
soil-derived, low concentrated (~414 ppm) and isotopically slightly depleted CO<sub>2</sub> ( $\delta^{13}\text{C}$ -CO<sub>2</sub> −28.4‰) towards very negative  
104 values (red dashed line).

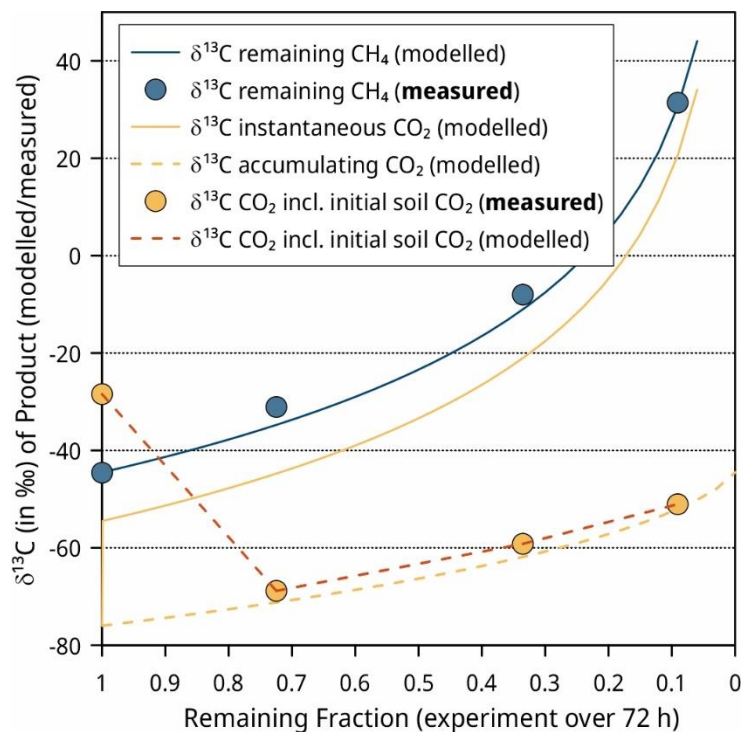

**Figure S2:** Closed System Rayleigh fractionation (modelled (lines) and data (dots) of the experiment) of the incubation with methane and air.

After Elsner et al. (2007) and Feisthauer et al. (2011) the slope of plotting  $\ln\left(\frac{\delta_t + 1000}{\delta_0 + 1000}\right)$  versus  $\ln\left(\frac{C_t}{C_0}\right)$  gives the enrichment factor  $\varepsilon$  (in‰; see Table S2 and Figure S3).

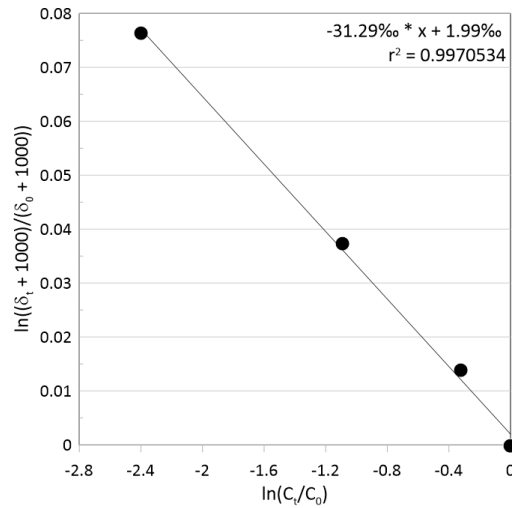

**Figure S3:** Methane concentration and  $\delta^{13}\text{C}$  change during the lab experiment 7644 (Steimbke peat). The slope (in ‰) corresponds to the enrichment factor  $\varepsilon$  (after Elsner et al. (2007) and Feisthauer et al. (2011)).

The calculated enrichment factor  $\varepsilon$  is with  $-31.3\text{‰}$  (Figure S3) in the upper known range of data from laboratory experiments and cultures for aerobic methanotrophs ( $-3$  to  $-39\text{‰}$ ; Templeton et al. (2006) and references therein). It has to be considered that respective data are still limited, but the so far reported data demonstrate that a differentiation between the alpha- and gamma-proteobacteria or between the carbon assimilation pathway (Type I: assimilation of formaldehyde via the ribulose-monophosphate pathway; Type II: serine pathway) cannot be achieved from isotopic enrichment factors (Feisthauer et al., 2011; Rasigraf et al., 2012). In a comparative study highest fractionation factors were with  $-27.9$  and  $-27.7\text{‰}$ , however, reported for the Type I methanotrophs *Methylococcus capsulatus* and *Methylobacter methanica* (Feisthauer et al., 2011). Our data and our lab enrichment culture dominated by members of the genera *Methylocystis* and *Methylobacter* add, however, further data on this still limited data set. Obviously, the isotopic fractionation of methane during aerobic methanotrophy at Steimbke results in a relatively strong fractionation. Reasons for this observation are, however, unclear. Previous studies speculated on the growth rates and physiological factors, and/or substrate limitation. Low oxygen concentrations may, theoretically, slow down methane oxidation by that favoring fractionation (Rasigraf et al., 2012; Templeton et al., 2006).

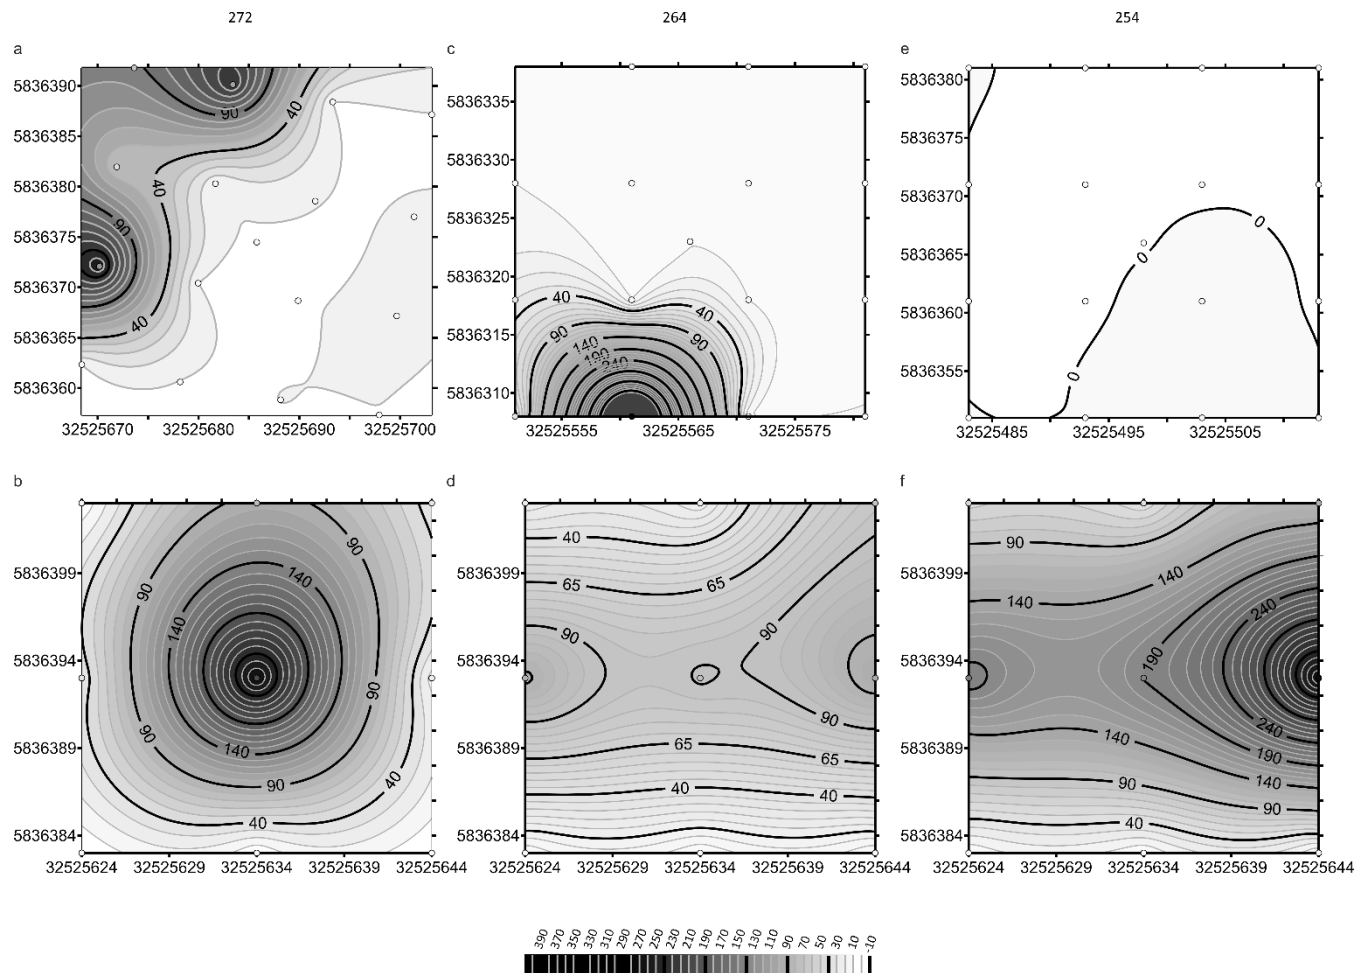

**Figure S4:** Gridding of methane fluxes from soil to the atmosphere at three well sites (a, c, e) and one reference site (b, d, f), which was measured at different time points in the active peat cutting area. The reference measurement is displayed below the corresponding well measurement. The measurements in b) was conducted one week prior to d), and the emissions in f) were determined one day after d) (see Table 1). The grey scale is depicted on the bottom right.

## 7 References

- 140 Berndmeyer, C., Thiel, V., Schmale, O., and Blumenberg, M.: Biomarkers for aerobic methanotrophy in the  
water column of the stratified Gotland Deep (Baltic Sea), *Org Geochem*, 55, 103-111,  
142 <https://doi.org/10.1016/j.orggeochem.2012.11.010>, 2013.
- Bodelier, P. L., Gillisen, M. J., Hordijk, K., Damste, J. S., Rijpstra, W. I., Geenevasen, J. A., and Dunfield, P. F.:  
144 A reanalysis of phospholipid fatty acids as ecological biomarkers for methanotrophic bacteria, *ISME J*, 3, 606-  
617, <https://doi.org/10.1038/ismej.2009.6>, 2009.
- 146 Bowman, J. P., Skerratt, J. H., Nichols, P. D., and Sly, L. I.: Phospholipid fatty acid and lipopolysaccharide fatty  
acid signature lipids in methane-utilizing bacteria, *FEMS Microbio Lett*, 85, 15-22,  
148 <https://doi.org/10.1111/j.1574-6968.1991.tb04693.x>, 1991.
- Buser, H. R., Arn, H., Guerin, P., and Rauscher, S.: Determination of double bond position in mono-unsaturated  
150 acetates by mass spectrometry of dimethyl disulfide adducts, *Anal Chem*, 55, 818-822,  
<https://doi.org/10.1021/ac00257a003>, 1983.
- 152 Dedysh, S. N.: Exploring methanotroph diversity in acidic northern wetlands: Molecular and cultivation-based  
studies, *Microbiology*, 78, 655-669, <https://doi.org/10.1134/s0026261709060010>, 2009.
- 154 Dedysh, S. N., Belova, S. E., Bodelier, P. L. E., Smirnova, K. V., Khmelenina, V. N., Chidthaisong, A.,  
Trotsenko, Y. A., Liesack, W., and Dunfield, P. F.: *Methylocystis heyeri* sp. nov., a novel type II  
156 methanotrophic bacterium possessing 'signature' fatty acids of type I methanotrophs, *Int J Syst Evol*  
*Microbiol*, 57, 472-479, 10.1099/ijs.0.64623-0, 2007.
- 158 Elsner, M., McKelvie, J., Lacrampe Couloume, G., and Sherwood Lollar, B.: Insight into Methyl tert-Butyl Ether  
(MTBE) Stable Isotope Fractionation from Abiotic Reference Experiments, *Environ Sci Technol*, 41, 5693-  
160 5700, 10.1021/es070531o, 2007.
- Feisthauer, S., Vogt, C., Modrzyński, J., Szlenkier, M., Krüger, M., Siegert, M., and Richnow, H.-H.: Different  
162 types of methane monooxygenases produce similar carbon and hydrogen isotope fractionation patterns during  
methane oxidation, *Geochim Cosmochim Acta*, 75, 1173-1184, <https://doi.org/10.1016/j.gca.2010.12.006>, 2011.
- 164 Gatellier, J.-P. L. A., de Leeuw, J. W., Sinninghe Damsté, J. S., Derenne, S., Largeau, C., and Metzger, P.: A  
comparative study of macromolecular substances of a Coorongite and cell walls of the extant alga  
166 *Botryococcus braunii*, *Geochim Cosmochim Acta*, 57, 2053-2068, [https://doi.org/10.1016/0016-7037\(93\)90093-c](https://doi.org/10.1016/0016-7037(93)90093-c), 1993.
- 168 Kaupper, T., Mendes, L. W., Harnisz, M., Krause, S. M. B., Horn, M. A., and Ho, A.: Recovery in  
methanotrophic activity does not reflect on the methane-driven interaction network after peat mining, *Appl*  
170 *Environ Microbiol*, 87, <https://doi.org/10.1128/AEM.02355-20>, 2021.
- Knief, C.: Diversity and Habitat Preferences of Cultivated and Uncultivated Aerobic Methanotrophic Bacteria  
172 Evaluated Based on *pmoA* as Molecular Marker, *Front Microbiol*, 6, 1346,  
<https://doi.org/10.3389/fmicb.2015.01346>, 2015.
- 174 Knoblauch, C., Zimmermann, U., Blumenberg, M., Michaelis, W., and Pfeiffer, E.-M.: Methane turnover and  
temperature response of methane-oxidizing bacteria in permafrost-affected soils of northeast Siberia, *Soil Biol*  
176 *Biochem*, 40, 3004-3013, <https://doi.org/10.1016/j.soilbio.2008.08.020>, 2008.
- Nichols, P. D., Glen A, S., Antworth, C. P., Hanson, R. S., and White, D. C.: Phospholipid and  
178 lipopolysaccharide normal and hydroxy fatty acids as potential signatures for methane-oxidizing bacteria,  
*FEMS Microbiol Lett*, 31, 327-335, <https://doi.org/10.1111/j.1574-6968.1985.tb01168.x>, 1985.



- 180 Oppermann, B. I., Michaelis, W., Blumenberg, M., Frerichs, J., Schulz, H. M., Schippers, A., Beaubien, S. E.,  
and Krüger, M.: Soil microbial community changes as a result of long-term exposure to a natural CO<sub>2</sub> vent,  
182 *Geochim Cosmochim Ac*, 74, 2697-2716, <https://doi.org/10.1016/j.gca.2010.02.006>, 2010.
- Rasigraf, O., Vogt, C., Richnow, H.-H., Jetten, M. S. M., and Ettwig, K. F.: Carbon and hydrogen isotope  
184 fractionation during nitrite-dependent anaerobic methane oxidation by *Methylomirabilis oxyfera*, *Geochim*  
*Cosmochim Ac*, 89, 256-264, <http://dx.doi.org/10.1016/j.gca.2012.04.054>, 2012.
- 186 Templeton, A. S., Chu, K.-H., Alvarez-Cohen, L., and Conrad, M. E.: Variable carbon isotope fractionation  
expressed by aerobic CH<sub>4</sub>-oxidizing bacteria, *Geochim Cosmochim Ac*, 70, 1739-1752,  
188 <https://doi.org/10.1016/j.gca.2005.12.002>, 2006.
